# Supplementary material
Source: Springer Nature journal article supplement (https://www.springermedizin.de/resource/supplementary/13054_2013_3033_MOESM5_ESM.pdf/9712438)

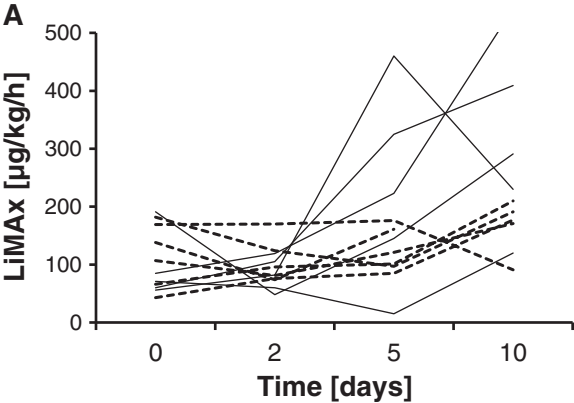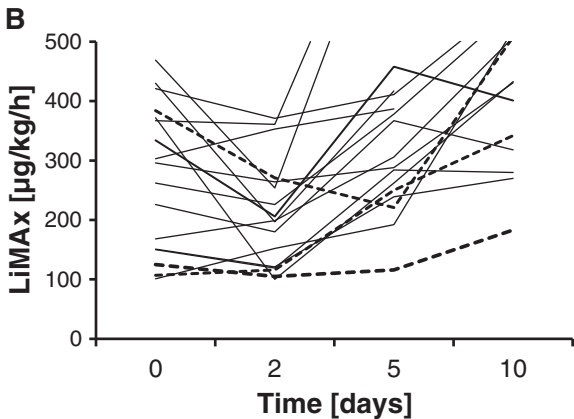

Supplement: MOESM5 [file 9712438]
